# Supplementary material for: Uva-ursi extract and ibuprofen as alternative treatments of adult female urinary tract infection (ATAFUTI): study protocol for a randomised controlled trial
Source: PubMed Central journal article supplement (PMC5591533; doi:10.1186/s13063-017-2145-7), 2017-09-08

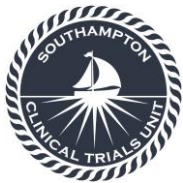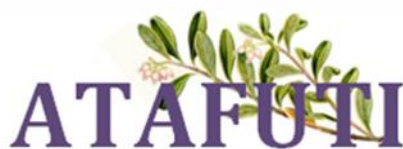

## A Trial Investigating Alternative Treatments of Adult Female Urinary Tract Infection.

|                      |   |   |   |   |   |   |   |   |   |
|----------------------|---|---|---|---|---|---|---|---|---|
| Date of Registration | D | D | M | M | M | Y | Y | Y | Y |
| Participant ID       |   |   |   |   |   |   |   |   |   |
| Patient Initials     |   |   |   |   |   |   |   |   |   |

### Participant Diary

CRF 0 3

#### INSTRUCTIONS FOR COMPLETING THE DIARY

We would like you to complete this two week diary. It is divided into 3 sections as below:

**Section 1:** Please complete this section on the day you saw your doctor or Nurse

**Section 2:** Please complete this section every day over the next two weeks or until symptoms subside and no further treatments are being used.

**Section 3:** Please complete this section once you have finished entering into Section 2.

*Once you have completed this diary, please return to the address below using the pre-paid addressed envelope provided. When we have received your diary you will receive a £5 voucher from the ATAFUTI team as a thank you.*

FREEPOST RTHT-TBHY-ZJJR  
ATAFUTI Trial  
Southampton Clinical Trials Unit  
MP 131  
Southampton General Hospital  
Tremona Road  
Southampton  
Hampshire  
SO17 1YN

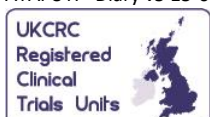

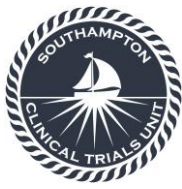

### ATAFUTI

|                       |  |  |  |  |  |  |
|-----------------------|--|--|--|--|--|--|
| <b>Participant ID</b> |  |  |  |  |  |  |
|-----------------------|--|--|--|--|--|--|

|                             |  |  |  |
|-----------------------------|--|--|--|
| <b>Participant Initials</b> |  |  |  |
|-----------------------------|--|--|--|

**SECTION 1: ABOUT YOU**  
*Please complete this section on the day you saw your doctor.*

**Part A. Month and year of birth**

|   |   |   |   |   |   |   |
|---|---|---|---|---|---|---|
| M | M | M | Y | Y | Y | Y |
|---|---|---|---|---|---|---|

**Part B. History of Urine Infections**

1. Have you ever had a urine infection diagnosed by a doctor, at any point in the past not counting this current episode? **Please tick one box**

Yes       No       Do not know

*If Yes, please complete remaining questions in Part B*

*If No or Do not know then go to Part C*

2. How many times have you been treated for a urine infection in the past 2 years?  
**Please tick one box.**

|                    |                          |
|--------------------|--------------------------|
| 0                  | <input type="checkbox"/> |
| 1                  | <input type="checkbox"/> |
| 2                  | <input type="checkbox"/> |
| 3 or more          | <input type="checkbox"/> |
| Unable to remember | <input type="checkbox"/> |

3. Have you had a urine infection in the last year? Yes       No

**If Yes, how many months since your last one?**

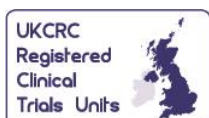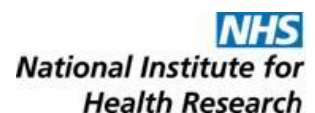



**ATAFUTI**

Participant ID

Participant Initials

4. How was your last urine infection treated? *Please tick relevant boxes.*

Antibiotics

Name of Antibiotic (if known)

Other

If Other, please specify

No Treatment

Do not remember

Now please complete Part C

**Part C Additional information**

1. When you contacted your GP today were you expecting to receive any of the following?  
*Please tick one box for each option.*

Advice Yes  No  Unsure

Tests/Investigations Yes  No  Unsure

Antibiotics Yes  No  Unsure

Other Yes  No  Unsure

If Other, please specify

2. Do you believe the following statement?  
*Please tick one box.*

Herbs might help my symptoms. Yes  No  Unsure

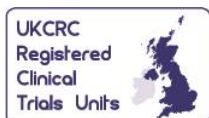

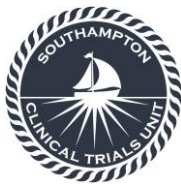

### ATAFUTI

|                       |  |  |  |  |  |  |
|-----------------------|--|--|--|--|--|--|
| <b>Participant ID</b> |  |  |  |  |  |  |
|-----------------------|--|--|--|--|--|--|

|                             |  |  |  |
|-----------------------------|--|--|--|
| <b>Participant Initials</b> |  |  |  |
|-----------------------------|--|--|--|

3. Before you went to see your doctor did you try and manage your urine infection with any of the following? **Please tick all that apply.**

- Cranberry juice
- Other fruit juice
- Bicarbonate solution
- Potassium citrate
- Other e.g. paracetamol

If Other, please specify

|  |
|--|
|  |
|--|



### ATAFUTI

|                       |  |  |  |  |  |  |
|-----------------------|--|--|--|--|--|--|
| <b>Participant ID</b> |  |  |  |  |  |  |
|-----------------------|--|--|--|--|--|--|

|                             |  |  |  |
|-----------------------------|--|--|--|
| <b>Participant Initials</b> |  |  |  |
|-----------------------------|--|--|--|

**SECTION 2:  
DIARY OF URINE INFECTION SYMPTOMS/PROBLEMS/TREATMENTS**

Please fill in the diary on the next few pages to record your symptoms and any treatments (study medication, antibiotics, other medications or products) used. Please start **THIS EVENING** (the evening of the day on which you saw your doctor) and continue to fill this in each evening for 2 weeks or until all symptoms have subsided and no treatments are being taken. **Once you have stopped completing the diary**, please enter the date in the relevant box. If you stopped filling the diary in Week 1 there is no need to complete Week 2. Once your symptoms have settled or after 14 days when you are no longer entering information in Section 2 then please fill in **Section 3**.

**For each week the diary is split into two sections – please could you record your symptoms in the first section and all treatments taken in the second section.**

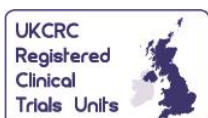







**ATAFUTI**

|                       |  |  |  |  |  |  |
|-----------------------|--|--|--|--|--|--|
| <b>Participant ID</b> |  |  |  |  |  |  |
|-----------------------|--|--|--|--|--|--|

|                             |  |  |  |
|-----------------------------|--|--|--|
| <b>Participant Initials</b> |  |  |  |
|-----------------------------|--|--|--|

**WEEK 2 SYMPTOMS**

**For your symptoms**, the answer you give should reflect how you have felt over the last 24 hours. If you have no symptoms or problems, please enter 0 (to indicate normal/not affected). Equally, if a symptom or problem ends during the period of the diary, enter 0 until the end of the diary.

For each symptom/problem, rate how bad it has been using the following scale. The first shaded column is completed as an example - please fill in your own numbers:

- 0 = Normal/not affected**
- 1 = Very little problem**
- 2 = Slight problem**
- 3 = Moderately bad**
- 4 = Bad**
- 5 = Very bad**
- 6 = As bad as it could be**

|                                                                            | DAY         | e.g. | 1 | 2 | 3 | 4 | 5 | 6 | 7 |
|----------------------------------------------------------------------------|-------------|------|---|---|---|---|---|---|---|
|                                                                            | DAY OF WEEK | Mon  |   |   |   |   |   |   |   |
| Symptom/Problem                                                            |             |      |   |   |   |   |   |   |   |
| Fever                                                                      | 0           |      |   |   |   |   |   |   |   |
| Pain in the side                                                           | 1           |      |   |   |   |   |   |   |   |
| Blood in urine                                                             | 0           |      |   |   |   |   |   |   |   |
| Smelly urine                                                               | 5           |      |   |   |   |   |   |   |   |
| Burning (Burning or pain when passing urine)                               | 2           |      |   |   |   |   |   |   |   |
| Urgency (Having to go in a hurry)                                          | 2           |      |   |   |   |   |   |   |   |
| Day time frequency (Having to go more often than usual during the day)     | 2           |      |   |   |   |   |   |   |   |
| Night time frequency (Having to go more often than usual during the night) | 0           |      |   |   |   |   |   |   |   |
| Tummy pain (When not passing urine)                                        | 0           |      |   |   |   |   |   |   |   |
| Restricted activities                                                      | 1           |      |   |   |   |   |   |   |   |
| Unwell                                                                     | 0           |      |   |   |   |   |   |   |   |

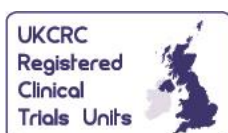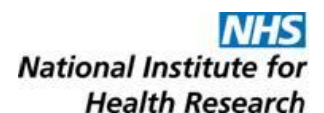







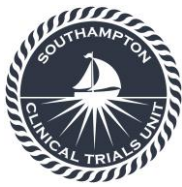

**ATAFUTI**

**Participant ID**

**Participant Initials**

4. Have you been admitted to hospital for a problem related to your urine infection?

Yes  No

If YES, then how many nights did you spend in hospital?

5. As a result of the help managing your symptoms in this study and the advice you were given, do you feel you are:

Able to cope with life? Much better  Better  Same or less

Able to understand your illness? Much better  Better  Same or less

Able to cope with your illness? Much better  Better  Same or less

Able to keep yourself healthy? Much better  Better  Same or less

Confident about your health? Much more  Better  Same or less

Able to help yourself? Much more  Better  Same or less

6. Do you think you that took real Uva Ursi? **Please tick one box.**

Yes  No  Unsure

7. Do you think that the study medication helped your symptoms? **Please tick one box.**

Yes  No  Unsure

8. Do you think that any additional treatment that you took helped your symptoms? **Please tick one box.**

Yes  No  Unsure

If YES, please specify.

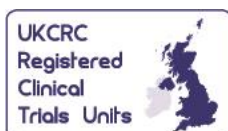



### ATAFUTI

|                       |  |  |  |  |  |  |
|-----------------------|--|--|--|--|--|--|
| <b>Participant ID</b> |  |  |  |  |  |  |
|-----------------------|--|--|--|--|--|--|

|                             |  |  |  |
|-----------------------------|--|--|--|
| <b>Participant Initials</b> |  |  |  |
|-----------------------------|--|--|--|

### That is the end of the questions!

The information you have provided will remain confidential and the pooled data will help us to improve our management and treatment of patients with urine infections.

**Please add any comments you have about urine infections or this study.**

Once we have received your diary we will send you a £5 voucher to say thank you very much for completing the symptom diary and questions. ***Please remember to return any unused trial medication in the prepaid addressed packaging that you were given by your GP or Nurse.***

If you have any problems or queries, please contact:

Catherine Simpson  
 ATAFUTI Clinical Trials Coordinators  
 Southampton Clinical Trials Unit  
 MP 131  
 Southampton General Hospital  
 Tremona Road  
 Southampton  
 Hampshire  
 SO16 6YD  
**023 8120 5171**

### THANK YOU!

**You have made a valuable contribution to this important medical research.**

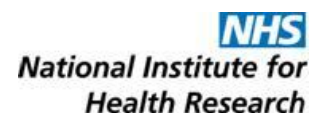

Supplement: 13063_2017_2145_MOESM6_ESM.pdf [file 13063_2017_2145_MOESM6_ESM.pdf]
