# Supplementary material for: Uva-ursi extract and ibuprofen as alternative treatments of adult female urinary tract infection (ATAFUTI): study protocol for a randomised controlled trial
Source: PubMed Central journal article supplement (PMC5591533; doi:10.1186/s13063-017-2145-7), 2017-09-08
Supplement: 13063_2017_2145_MOESM5_ESM.pdf [file 13063_2017_2145_MOESM5_ESM.pdf]

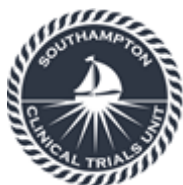

Ethics number:

14/SC/1143

Centre ID:

Participant's Initials:

(If no middle initial insert '-')

Participant's Month & Year of Birth:

MMMYYYY

Participant Trial ID:

### ATAFUTI

A Trial Investigating Alternative Treatments of Adult Female Urinary Tract Infection.

### CONSENT FORM

#### Main Trial + Day 4 Urine Collection

Name of Researcher: Professor Michael Moore

Please Initial Box

1. I confirm that I have read and understand the participant information sheet (version xx dated xx/xx/xx) for the above trial. I have had the opportunity to consider the information, ask questions and have had these answered satisfactorily.
2. I understand that my participation is voluntary and that I am free to withdraw at any time without giving any reason, and without my medical care or legal rights being affected.
3. I understand that I will be asked to delay taking my treatment of antibiotics.
4. I understand that I have a 1 in 4 chance of receiving no symptom relief treatment.
5. I consent to the collection and use of information about me in accordance with the participant information sheet.
6. I consent to having a pregnancy test if required.
